# Supplementary material for: Factors Moderating the Association between Cannabis Use and Psychosis Risk: A Systematic Review
Source: MDPI journal article supplement (doi:10.3390/brainsci10020097), 2020-02-12
Supplement: s1 [file s1]

*Systematic Review*

# **Factors Moderating the Association Between Cannabis Use and Psychosis Risk: A Systematic Review**

**Sanne J. van der Steur <sup>1</sup>, Albert Batalla <sup>1</sup>, Matthijs G. Bossong <sup>1\*</sup>**

<sup>1</sup> Department of Psychiatry, University Medical Center Utrecht Brain Center, Utrecht University, Utrecht, the Netherlands

\* Correspondence: [m.bossong@umcutrecht.nl](mailto:m.bossong@umcutrecht.nl); Tel.: +31-88-7556369

## Supplementary Materials

**Table 1.** Overview of studies included in the present systematic review

| <b>Authors and year</b> | <b>Title</b>                                                                                                                                       | <b>Journal</b>                                             | <b>Subheading (nr)</b>         |
|-------------------------|----------------------------------------------------------------------------------------------------------------------------------------------------|------------------------------------------------------------|--------------------------------|
| Allegri et al. (2013)   | Current cannabis use and age of psychosis onset: A gender-mediated relationship? Results from an 8-year FEP incidence study in Bologna.            | <i>Psychiatry Research</i> , 210(1), 368–370               | 3.2 AOP                        |
| Auther et al. (2015)    | Alcohol confounds relationship between cannabis misuse and psychosis conversion in a high-risk sample.                                             | <i>Acta Psychiatrica Scandinavica</i> , 132(1), 60–68      | 3.3 Transition in CHR subjects |
| Auther et al. (2012)    | Prospective Study of Cannabis Use in Adolescents at Clinical High Risk for Psychosis: Impact on Conversion to Psychosis and Functional Outcome.    | <i>Psychological medicine</i> 42(12): 2485–97              | 3.1 Type of cannabis           |
| Barrigón et al. (2010)  | Temporal Relationship of First-Episode Non-Affective Psychosis with Cannabis Use: A Clinical Verification of an Epidemiological Hypothesis.        | <i>Journal of Psychiatric Research</i> , 44(7), 413–420    | 3.1 Genetics                   |
| Bioque et al. (2019)    | Gene-Environment Interaction between an Endocannabinoid System Genetic Polymorphism and Cannabis Use in First Episode of Psychosis.                | <i>European Neuropsychopharmacology</i> 29(6): 786–94      | 3.1 Patterns of cannabis use   |
| Colizzi et al. (2015)   | Interaction between Functional Genetic Variation of DRD2 and Cannabis Use on Risk of Psychosis.                                                    | <i>Schizophrenia Bulletin</i> , 41(5), 1171–1182           | 3.1 Genetics                   |
| Compton et al. (2009)   | Association of Pre-Onset Cannabis, Alcohol, and Tobacco Use with Age at Onset of Prodrome and Age at Onset of Psychosis in First-Episode Patients. | <i>American Journal of Psychiatry</i> , 166(11), 1251–1257 | 3.2 AOP                        |
| Costas et al. (2011)    | Interaction between <i>COMT</i> haplotypes and cannabis in schizophrenia: A case-only study in two samples from Spain.                             | <i>Schizophrenia Research</i> , 127(1–3), 22–27            | 3.1 Genetics                   |

|                                  |                                                                                                                                                     |                                                            |                                           |
|----------------------------------|-----------------------------------------------------------------------------------------------------------------------------------------------------|------------------------------------------------------------|-------------------------------------------|
| Dekker et al. (2012)             | Age at Onset of Non-Affective Psychosis in Relation to Cannabis Use, Other Drug Use and Gender                                                      | <i>Psychological Medicine</i> , 42(9), 1903–1911           | 3.2 AOP                                   |
| DeRosse et al. (2010)            | Cannabis Use Disorders in Schizophrenia: Effects on Cognition and Symptoms.                                                                         | <i>Schizophrenia Research</i> 120(1–3): 95–100             | 3.2 AOP                                   |
| Di Forti et al. (2012)           | Confirmation that the <i>AKT1</i> (rs2494732) genotype influences the risk of psychosis in cannabis users.                                          | <i>Biological Psychiatry</i> , 72(10), 811–816             | 3.1 Genetics                              |
| Di Forti et al. (2015)           | Proportion of patients in south London with first-episode psychosis attributable to use of high potency cannabis: A case-control study.             | <i>The Lancet Psychiatry</i> , 2(3), 233–238               | 3.1 Type of cannabis                      |
| Di Forti et al. (2009)           | High-potency cannabis and the risk of psychosis.                                                                                                    | <i>British Journal of Psychiatry</i> , 195(6), 488–491     | 3.1 Type of cannabis                      |
| Di Forti et al. (2019)           | The contribution of cannabis use to variation in the incidence of psychotic disorder across Europe (EU-GEI): a multicentre case-control study.      | <i>The Lancet Psychiatry</i> , 6(5), 427–436               | 3.1 Patterns + type of cannabis use       |
| Di Forti et al. (2014)           | Daily Use, Especially of High-Potency Cannabis, Drives the Earlier Onset of Psychosis in Cannabis Users.                                            | <i>Schizophrenia Bulletin</i> , 40(6), 1509–1517           | 3.1 Age of onset of cannabis use, 3.2 AOP |
| Donoghue et al. (2014)           | Cannabis use, gender and age of onset of schizophrenia: Data from the AESOP study.                                                                  | <i>Psychiatry Research</i> , 215(3), 528–532               | 3.2 AOP                                   |
| Estrada et al. (2011)            | Cannabis Use and Age at Onset of Psychosis: Further Evidence of Interaction with <i>COMT</i> Val158Met Polymorphism.                                | <i>Acta Psychiatrica Scandinavica</i> , 123(6), 485–492    | 3.2 AOP                                   |
| Gage et al. (2014)               | Associations of cannabis and cigarette use with psychotic experiences at age 18: findings from the Avon Longitudinal Study of Parents and Children. | <i>Psychological Medicine</i> , 44(16), 3435–3444          | 3.2 AOP                                   |
| Gage et al. (2013)               | Using mendelian randomisation to infer causality in depression and anxiety research.                                                                | <i>Depression and Anxiety</i> , 30(12), 1185–1193          | 3.1 Genetics                              |
| Galvez-Buccollini et al. (2012)  | Association between age at onset of psychosis and age at onset of cannabis use in non-affective psychosis.                                          | <i>Schizophrenia Research</i> , 139(1–3), 157–160          | 3.2 AOP                                   |
| Grech, Camilleri & Taylor (2012) | Cannabis use and age of admission to a psychiatric unit for first episode of psychosis.                                                             | <i>Malta Medical Journal</i> , 24(3), 17–20                | 3.2 AOP                                   |
| Gutiérrez et al. (2009)          | Variability of the <i>COMT</i> gene and modification of the risk of schizophrenia conferred by cannabis consumption.                                | <i>Revista de Psiquiatria y Salud Mental</i> , 2(2), 89–94 | 3.1 Genetics                              |

|                          |                                                                                                                                                   |                                                                          |                                |
|--------------------------|---------------------------------------------------------------------------------------------------------------------------------------------------|--------------------------------------------------------------------------|--------------------------------|
| Helle et al. (2016)      | Cannabis use is associated with 3 years earlier onset of schizophrenia spectrum disorder in a naturalistic, multi-site sample (N = 1119).         | <i>Schizophrenia Research</i> , 170(1), 217–221                          | 3.2 AOP                        |
| Henquet et al. (2009)    | COMT Val158Met moderation of cannabis-induced psychosis: A momentary assessment study of “switching on” hallucinations in the flow of daily life. | <i>Acta Psychiatrica Scandinavica</i> , 119(2), 156–160                  | 3.1 Genetics                   |
| Husted et al. (2012)     | Early environmental exposures influence schizophrenia expression even in the presence of strong genetic predisposition.                           | <i>Schizophrenia Research</i> , 137(1–3), 166–168                        | 3.1 Genetics                   |
| Karcher et al. (2019)    | Genetic Predisposition vs Individual-Specific Processes in the Association between Psychotic-like Experiences and Cannabis Use.                   | <i>JAMA Psychiatry</i> , 76(1), 87–94.                                   | 3.1 Patterns of cannabis use   |
| Kantrowitz et al. (2009) | Adolescent cannabis use, psychosis and catechol-O-methyltransferase genotype in african Americans and caucasians                                  | <i>Psychiatric Quarterly</i> , 80(4), 213–218                            | 3.1 Genetics                   |
| Kraan et al. (2016)      | Cannabis use and transition to psychosis in individuals at ultra-high risk: Review and meta-analysis.                                             | <i>Psychological Medicine</i> , 46(4), 673–681                           | 3.3 Transition in CHR subjects |
| Large et al. (2011)      | Cannabis Use and Earlier Onset of Psychosis: A systematic meta-analysis                                                                           | <i>Archives of General Psychiatry</i> , 68(6), 555                       | 3.2 AOP                        |
| Leadbeater et al. (2019) | Age-varying effects of cannabis use frequency and disorder on symptoms of psychosis, depression and anxiety in adolescents and adults.            | <i>Addiction</i> , 114(2), 278–293                                       | 3.1 Patterns of cannabis use   |
| Leeson et al. (2012)     | The effect of cannabis use and cognitive reserve on age at onset and psychosis outcomes in first-episode schizophrenia.                           | <i>Schizophrenia Bulletin</i> , 38(4), 873–880                           | 3.2 AOP                        |
| Lodhi et al. (2017)      | Investigation of the COMT Val158Met variant association with age of onset of psychosis, adjusting for cannabis use.                               | <i>Brain and Behavior</i> , 7(11), e00850                                | 3.1 Genetics                   |
| Mané et al. (2017)       | Cannabis use, COMT, BDNF and age at first-episode psychosis.                                                                                      | <i>Psychiatry Research</i> , 250, 38–43                                  | 3.1 Genetics                   |
| Marconi et al. (2016)    | Meta-analysis of the Association Between the Level of Cannabis Use and Risk of Psychosis.                                                         | <i>Schizophrenia Bulletin</i> , 42(5), 1262–1269                         | 3.1 Patterns of cannabis use   |
| Martin et al. (2014)     | Cannabis abuse and age at onset in schizophrenia patients with large, rare copy number variants.                                                  | <i>Schizophrenia Research</i> , 155(1–3), 21–25                          | 3.2 AOP                        |
| McHugh et al. (2017)     | Cannabis-induced attenuated psychotic symptoms: Implications for prognosis in young people at ultra-high risk for psychosis.                      | <i>Psychological Medicine</i> , 47(4), 616–626                           | 3.3 Transition in CHR subjects |
| Myles et al. (2016)      | Cannabis use in first episode psychosis: Meta-analysis of prevalence, and the time course of initiation and continued use.                        | <i>Australian and New Zealand Journal of Psychiatry</i> , 50(3), 208–219 | 3.2 AOP                        |

|                            |                                                                                                                                                                                                                                     |                                                                          |                                  |
|----------------------------|-------------------------------------------------------------------------------------------------------------------------------------------------------------------------------------------------------------------------------------|--------------------------------------------------------------------------|----------------------------------|
| Nawaz & Siddiqui (2015)    | Association of single nucleotide polymorphisms in catechol-omethyltransferase and serine-threonine protein kinase genes in the pakistani schizophrenic population: A study with special emphasis on cannabis and smokeless tobacco. | <i>CNS and Neurological Disorders - Drug Targets</i> , 14(8), 1086–1095. | 3.1 Genetics                     |
| Nieman et al. (2016)       | COMT Val158Met genotype and cannabis use in people with an At Risk Mental State for psychosis: Exploring Gene x Environment interactions.                                                                                           | <i>Schizophrenia Research</i> , 174(1–3), 24–28                          | 3.1 Genetics                     |
| O'Donoghue et al. (2015)   | Environmental factors and the age at onset in first episode psychosis.                                                                                                                                                              | <i>Schizophrenia Research</i> , 168(1–2), 106–112                        | 3.2 AOP                          |
| Öngür et al. (2009)        | Clinical characteristics influencing age at onset in psychotic disorders.                                                                                                                                                           | <i>Comprehensive Psychiatry</i> , 50(1), 13–19                           | 3.2 AOP                          |
| Pasman et al. (2018)       | GWAS of lifetime cannabis use reveals new risk loci, genetic overlap with psychiatric traits, and a causal effect of schizophrenia liability.                                                                                       | <i>Nature Neuroscience</i> , 21(9), 1161–1170                            | 3.1 Genetics                     |
| Pelayo-Terán et al. (2010) | Catechol-O-Methyltransferase (COMT) Val158Met variations and cannabis use in first-episode non-affective psychosis: Clinical-onset implications.                                                                                    | <i>Psychiatry Research</i> , 179(3), 291–296                             | 3.1 Genetics                     |
| Sevy et al. (2010)         | Are cannabis use disorders associated with an earlier age at onset of psychosis? A study in first episode schizophrenia.                                                                                                            | <i>Schizophrenia Research</i> , 120(1–3), 101–107.                       | 3.2 AOP                          |
| Schimmelman et al. (2011)  | Cannabis use disorder and age at onset of psychosis - A study in first-episode patients.                                                                                                                                            | <i>Schizophrenia Research</i> , 129(1), 52–56                            | 3.2 AOP                          |
| Schubart et al. (2011)     | Cannabis with high cannabidiol content is associated with fewer psychotic experiences.                                                                                                                                              | <i>Schizophrenia Research</i> , 130(1–3), 216–221                        | 3.1 Type of cannabis             |
| Schubart et al. (2011)     | Cannabis use at a young age is associated with psychotic experiences.                                                                                                                                                               | <i>Psychological Medicine</i> , 41(6), 1301–1310                         | 3.1 Age of onset of cannabis use |
| Setién-Suero et al. (2018) | Age of onset of Cannabis use and cognitive function in first-episode non-affective psychosis patients: Outcome at three-year follow-up.                                                                                             | <i>Schizophrenia Research</i> , 201, 159–166                             | 3.2 AOP                          |
| Stefanis et al. (2013)     | Age at initiation of cannabis use predicts age at onset of psychosis: The 7-to 8-year trend.                                                                                                                                        | <i>Schizophrenia Bulletin</i> , 39(2), 251–254                           | 3.2 AOP                          |
| Tosato et al. (2013)       | The impact of cannabis use on age of onset and clinical characteristics in first-episode psychotic patients. Data from the Psychosis Incident Cohort Outcome Study (PICOS).                                                         | <i>Journal of Psychiatric Research</i> , 47(4), 438–444                  | 3.2 AOP                          |
| Valmaggia et al. (2014)    | Cannabis use and transition to psychosis in people at ultra-high risk.                                                                                                                                                              | <i>Psychological Medicine</i> , 44(12), 2503–2512                        | 3.3 Transition in CHR subjects   |

|                          |                                                                                                                                       |                                                        |                                  |
|--------------------------|---------------------------------------------------------------------------------------------------------------------------------------|--------------------------------------------------------|----------------------------------|
| van Gastel et al. (2012) | Cannabis use and subclinical positive psychotic experiences in early adolescence: findings from a Dutch survey.                       | <i>Addiction</i> , 107(2), 381–387                     | 3.1 Age of onset of cannabis use |
| van Winkel et al. (2011) | Family-based analysis of genetic variation underlying psychosis-inducing effects of cannabis: Sibling analysis and proband follow-up. | <i>Archives of General Psychiatry</i> , 68(2), 148–157 | 3.1 Genetics                     |
| Vaucher et al. (2018)    | Cannabis use and risk of schizophrenia: a Mendelian randomization study.                                                              | <i>Molecular Psychiatry</i> , 23(5), 1287–1292         | 3.1 Genetics                     |
| Vaucher et al. (2017)    | Cannabis use and risk of schizophrenia: a Mendelian randomization study.                                                              | <i>Nature Publishing Group</i> , 23, 1287–1292         | 3.1 Genetics                     |
| Zammit et al. (2011)     | Cannabis, <i>COMT</i> and psychotic experiences.                                                                                      | <i>British Journal of Psychiatry</i> , 199(5), 380–385 | 3.1 Genetics                     |

<sup>1</sup>AOP: age of onset psychosis
